# Supplementary material
Source: MDPI journal article supplement (https://www.mdpi.com/2073-4395/10/5/709)
Supplement: s1 [file s1]

Supplementary materials

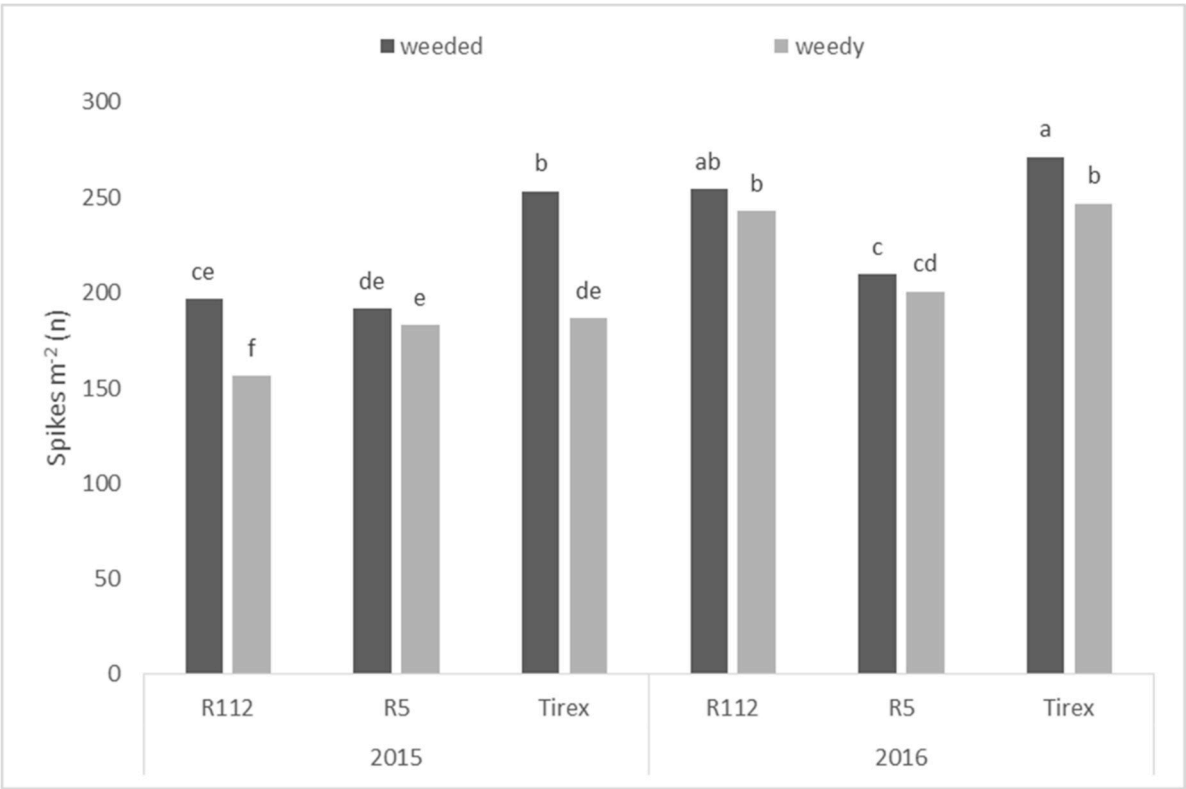

**Figure S1:** Number of spikes per unit area: year × genotype × weed presence interaction. Bars sharing the same letter are not significantly different ( $p < 0.05$ ).

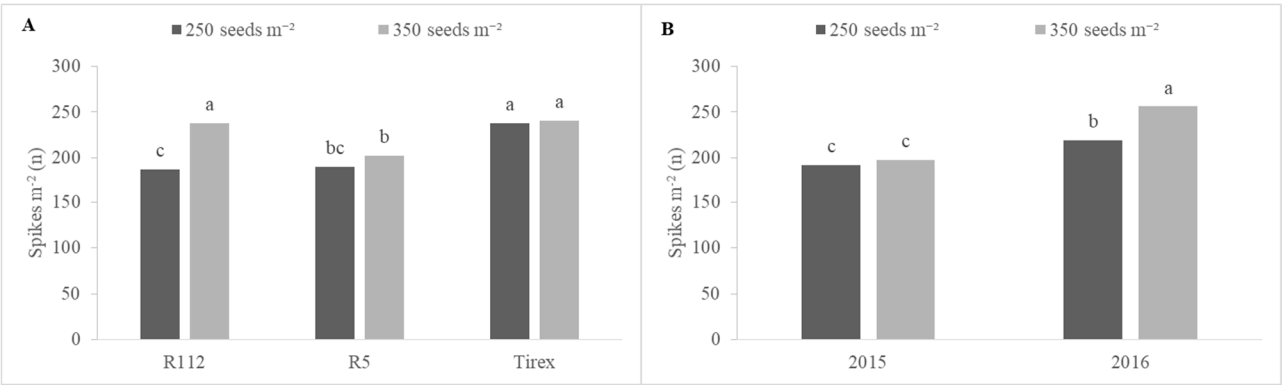

**Figure S2:** Number of spikes per unit area: A) genotype x sowing density interaction; B) year x sowing density interaction. Bars sharing the same letter are not significantly different ( $p < 0.05$ ).

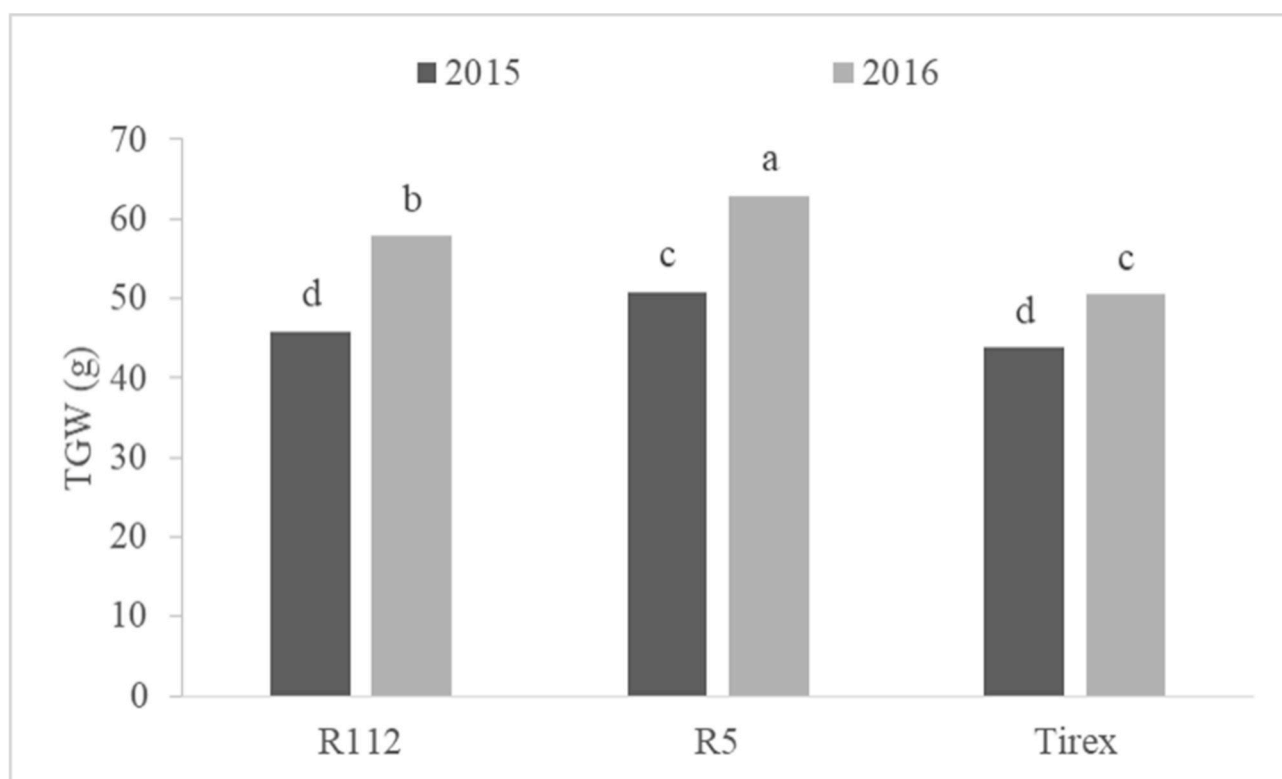

**Figure S3:** Thousand grain weight (TGW): genotype x year interaction. Bars sharing the same letter are not significantly different ( $p < 0.05$ ).

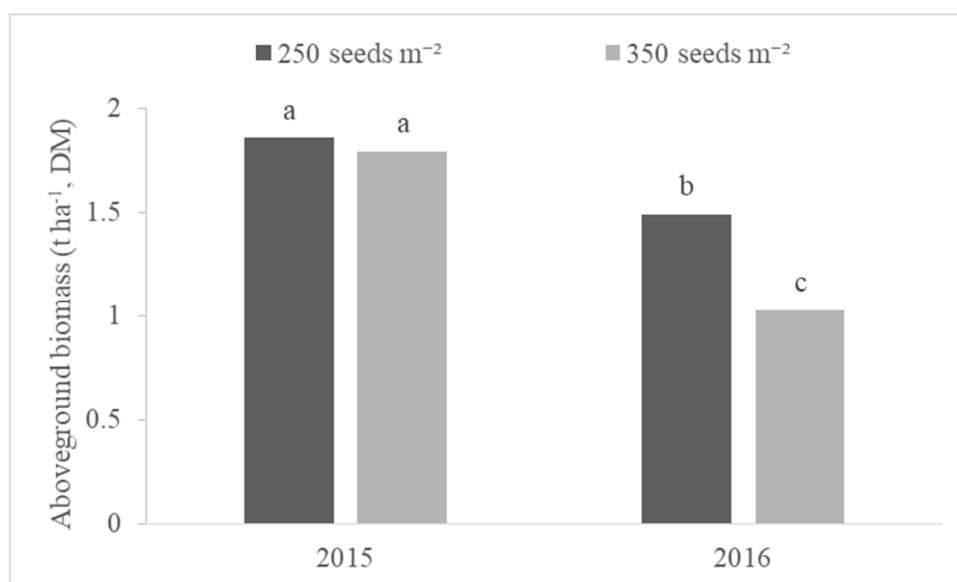

**Figure S4:** Weed aboveground biomass: year x sowing density interaction. Bars sharing the same letter are not significantly different ( $p < 0.05$ ).
